# Supplementary material for: Time-varying changes in the simulated structure of the Brewer–Dobson Circulation
Source: Copernicus journal article supplement (doi:10.5194/acp-17-1313-2017), 2017-01-30
Supplement: Supplementary file 1 [file acp-17-1313-2017-supplement.zip]

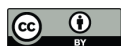

*Supplement of*

## **Time-varying changes in the simulated structure of the Brewer–Dobson Circulation**

**Chaim I. Garfinkel et al.**

*Correspondence to:* Chaim I. Garfinkel ([chaim.garfinkel@mail.huji.ac.il](mailto:chaim.garfinkel@mail.huji.ac.il))

- [acp-17-1313-2017-supplement-title-page.pdf](#)
- [BDAOAdecadalv16supplementary.pdf](#)
- [forvalentina.nc](#)

The copyright of individual parts of the supplement might differ from the CC-BY 3.0 licence.
